# Supplementary material
Source: ML conference proceedings conference paper supplement (https://openreview.net/forum?id=bOpHCZNRPQ)

LLaMA 3.1

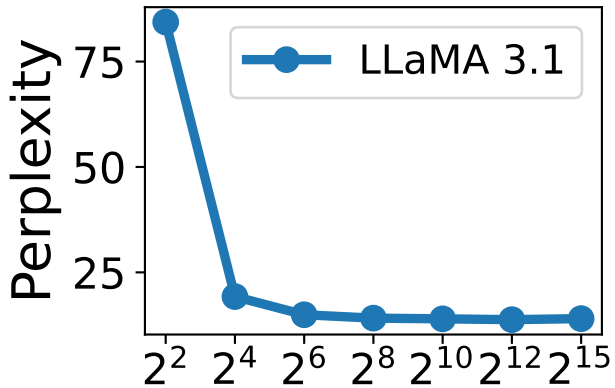

Mistral Nemo

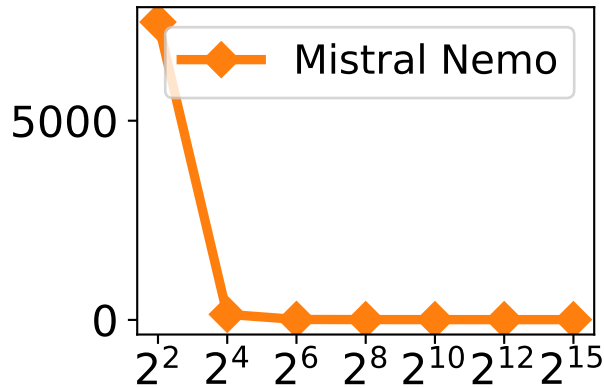

Phi 3.5

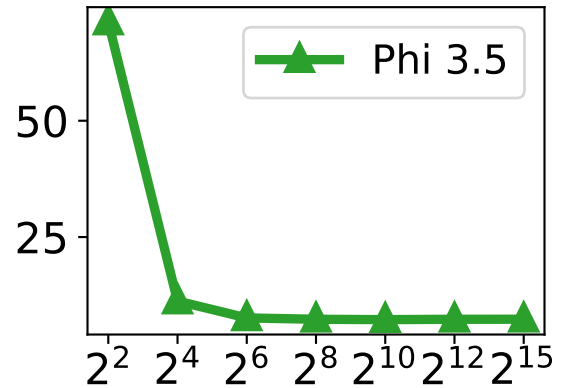

Softmax attention with top- $r$  indices

Supplement: supplementary_material [file attachment]

# $\exp(x)$ and $\text{ReLU}^\alpha(x - b)$

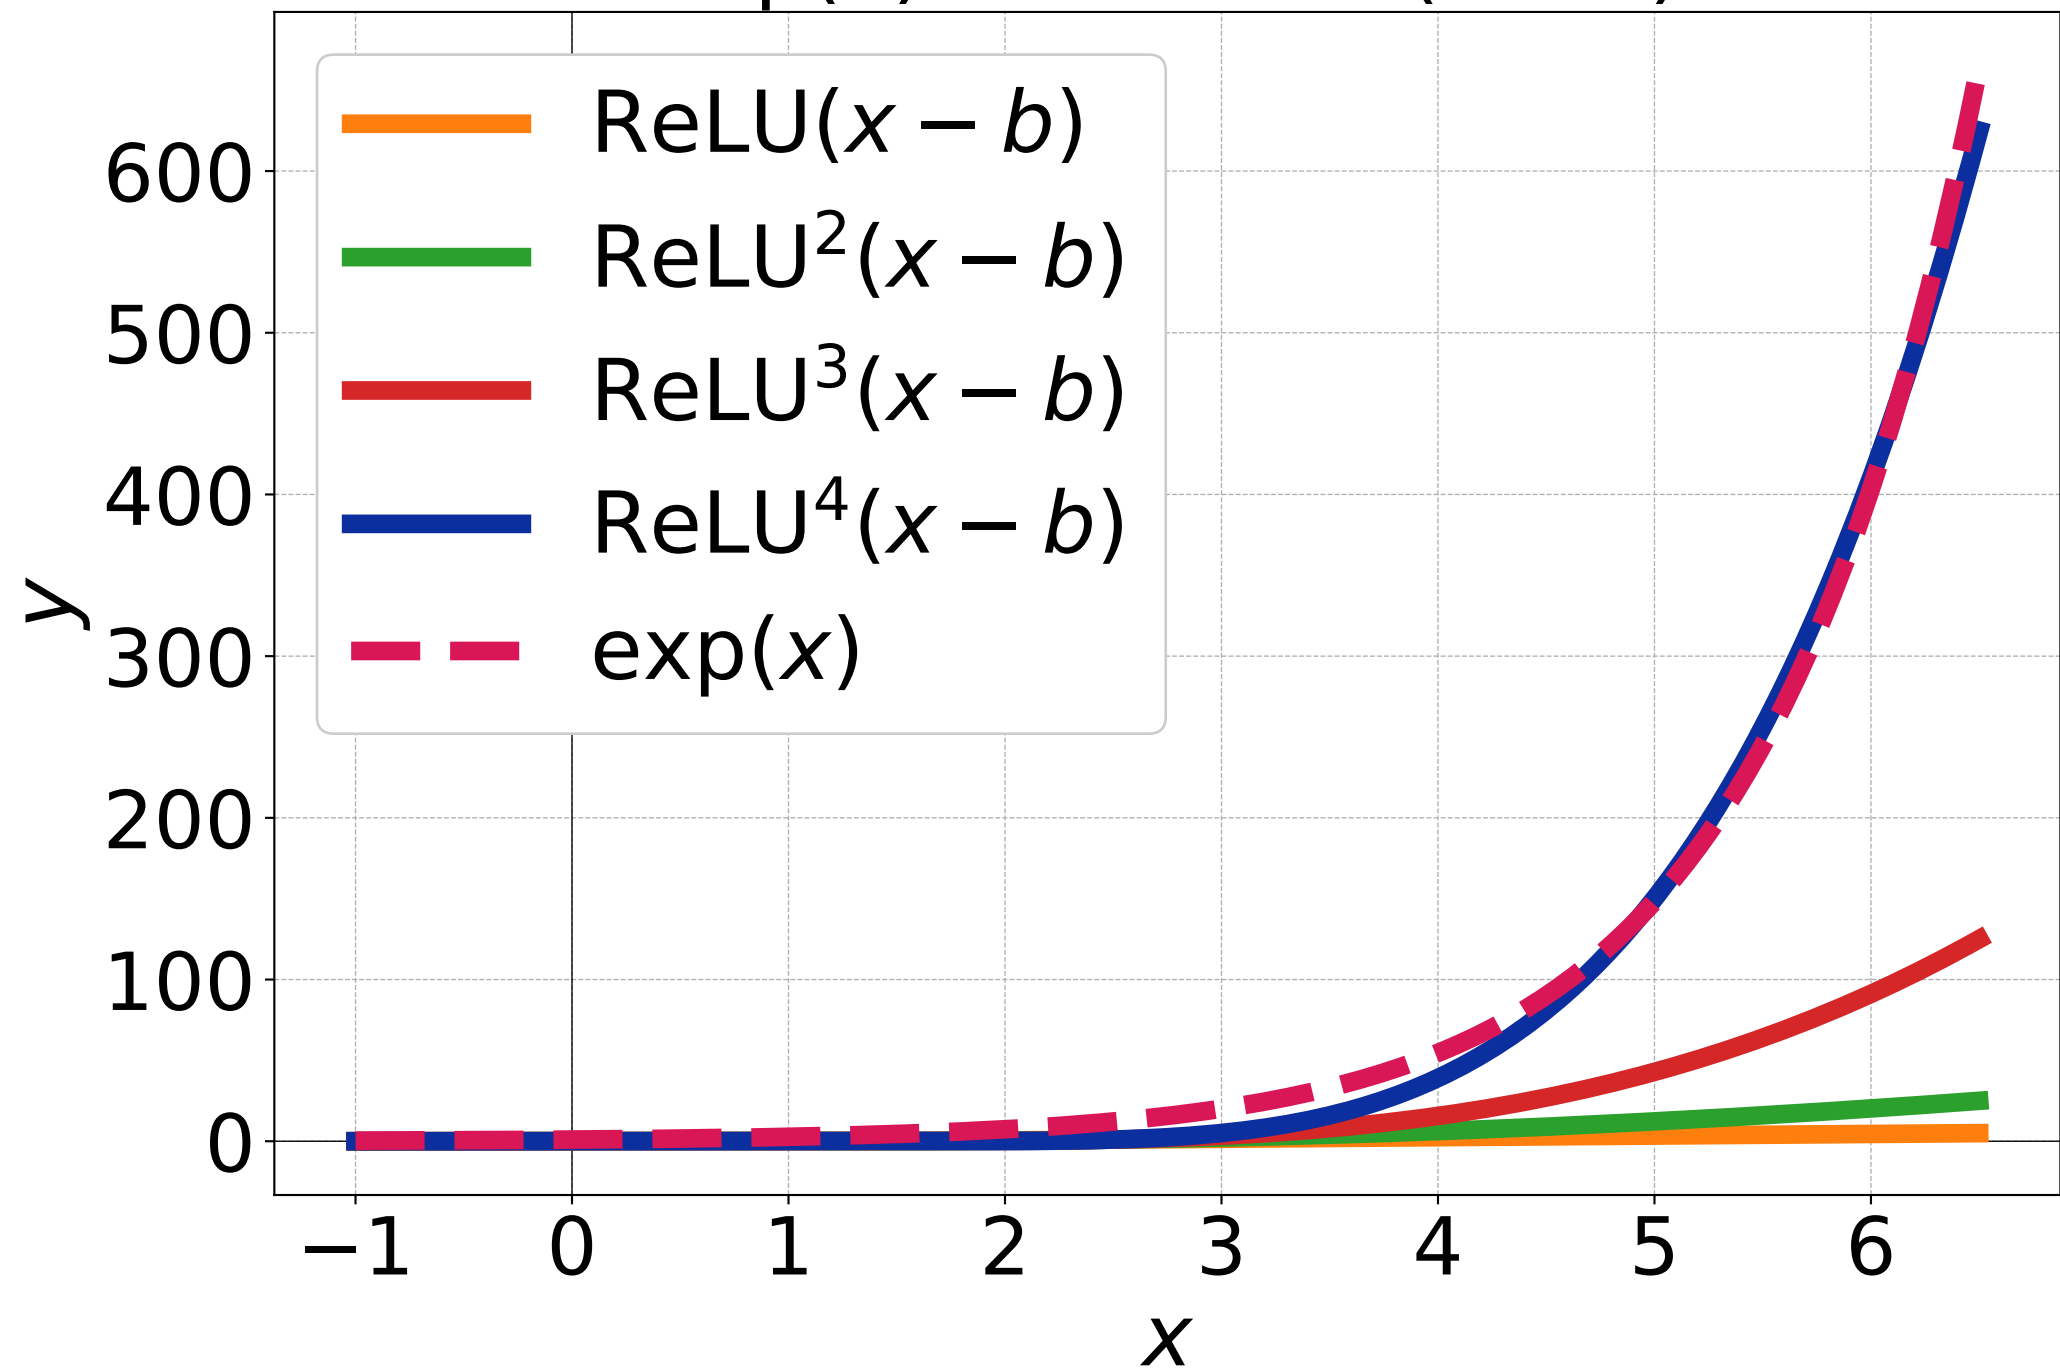

Supplement: supplementary_material [file attachment]
